# Supplementary material for: The γTuRC components Grip75 and Grip128 have an essential microtubule-anchoring function in theDrosophilagermline
Source: Oxford University Press journal article supplement (doi:10.1242/dev.02570), 2006-09-14
Supplement: dev02570-tables1.pdf [file dev02570-tables1.pdf]

**Table S1. Quantification of early spermatids**

|                               | 0:1  | 1:1   | 2:1   | 3:1   | 4:1  | Total |
|-------------------------------|------|-------|-------|-------|------|-------|
| OrR*                          | 1.8% | 98.2% | –     | –     | –    | 282   |
| <i>Grip75</i> <sup>175</sup>  | –    | 65.2% | 28.6% | 4.5%  | 1.7% | 290   |
| <i>Grip128</i> <sup>352</sup> | 2.5% | 53.4% | 29.5% | 12.9% | 1.7% | 363   |

Loose spermatids containing identifiable nuclei and Nebenkerns were scored. The percentage of cells with the indicated ratio of nuclei per Nebenkern is given.
